# Supplementary material for: Constructing layered double hydroxide derived heterogeneous Ti3C2Tx@S–MCoP (M = Ni, Mn, Zn) with S-vacancies to boost sodium storage performance
Source: Royal Society of Chemistry journal article supplement (doi:10.1039/d2ta05402g), 2022-01-01
Supplement: d2ta05402g1.pdf [file d2ta05402g1.pdf]

## Supporting Information

### **Constructing layered double hydroxides derived heterogeneous $Ti_3C_2T_x@S-$ MCoP (M=Ni, Mn, Zn) with S-vacancies to boost sodium storage performance**

Qun Li <sup>a</sup>, Qingze jiao <sup>a,c</sup>, Huanjun Li <sup>a</sup>, Yu Yan <sup>b</sup>, Chengxing Lu <sup>b</sup>, Xueran Shen <sup>a</sup>, Tingting Gu <sup>a</sup>, Wei Zhou <sup>b,\*</sup>, Yun Zhao <sup>a</sup>, Hansheng Li <sup>a</sup>, and Caihong Feng <sup>a,\*</sup>

<sup>a</sup>School of Chemistry and Chemical Engineering, Beijing Key Laboratory for Chemical Power Source and Green Catalysis, Beijing Institute of Technology, Beijing 10081, China

<sup>b</sup>School of Chemistry, Beijing Advanced Innovation Center for Biomedical Engineering, Beihang University, Beijing 100191, China

<sup>c</sup>School of Materials and Environment, Beijing Institute of Technology (Zhuhai Campus), Zhuhai 519085, China

\*Corresponding author E-mail: zhouwei@buaa.edu.cn (Wei Zhou), fengch@bit.edu.cn (Caihong Feng)

## Supporting Figures and Tables

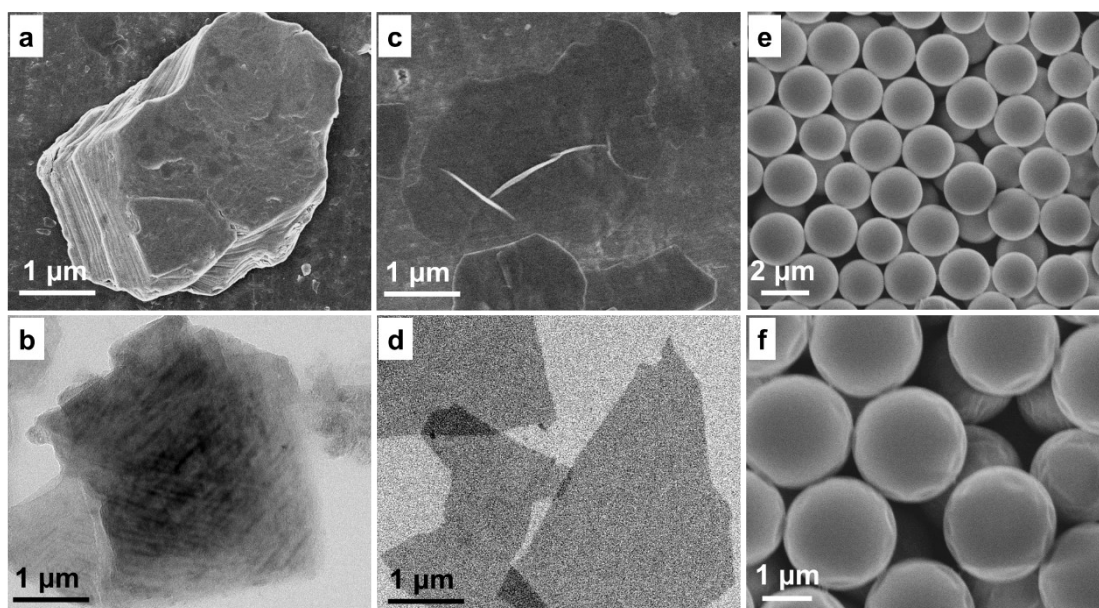

**Fig. S1.** (a)-(b) SEM and TEM images of MAX. (c)-(d) SEM and TEM images of Ti<sub>3</sub>C<sub>2</sub>T<sub>x</sub> MXene. (e)-(f) SEM images of PMMA spheres.

As shown in **Fig. S1a-b**, the Ti<sub>3</sub>AlC<sub>2</sub> MAX exhibits a typical massive morphology with a smooth surface. After LiF and HCl etching and ultrasonic exfoliation, the bulk structure is transformed into a typical two-dimensional nanosheets, indicating the Ti<sub>3</sub>C<sub>2</sub>T<sub>x</sub> is successfully prepared (**Fig. S1c-d**). The as-prepared PMMA spheres possess an average size of 2 μm with smooth surface (**Fig. S1e-f**).

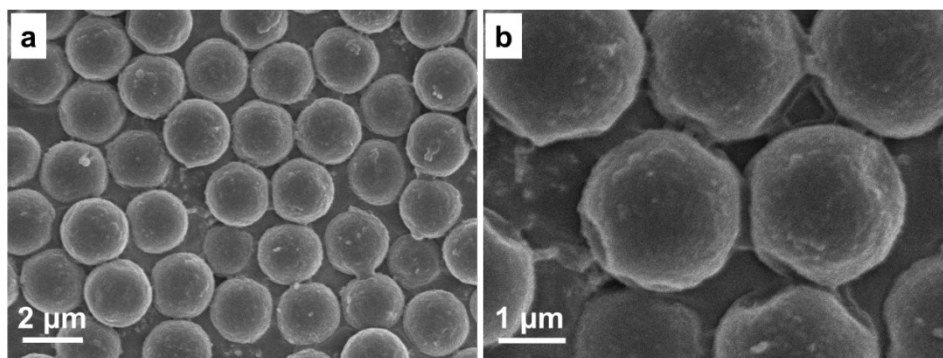

**Fig. S2.** SEM images of PMMA@Ti<sub>3</sub>C<sub>2</sub>T<sub>x</sub>.

As shown in **Fig. S2**, after Ti<sub>3</sub>C<sub>2</sub>T<sub>x</sub> wrapping, the surface of PMMA@Ti<sub>3</sub>C<sub>2</sub>T<sub>x</sub> spheres becomes rough with an average size of 2 μm.

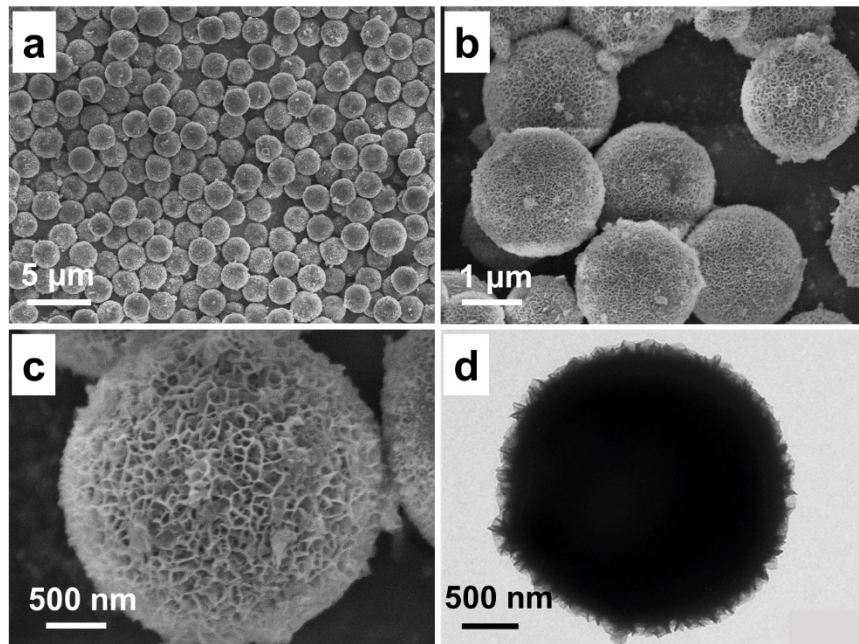

**Fig. S3.** (a)-(c) SEM images of PMMA@Ti<sub>3</sub>C<sub>2</sub>T<sub>x</sub>@NiCo-LDHs. (d) TEM image of PMMA@Ti<sub>3</sub>C<sub>2</sub>T<sub>x</sub>@NiCo-LDHs.

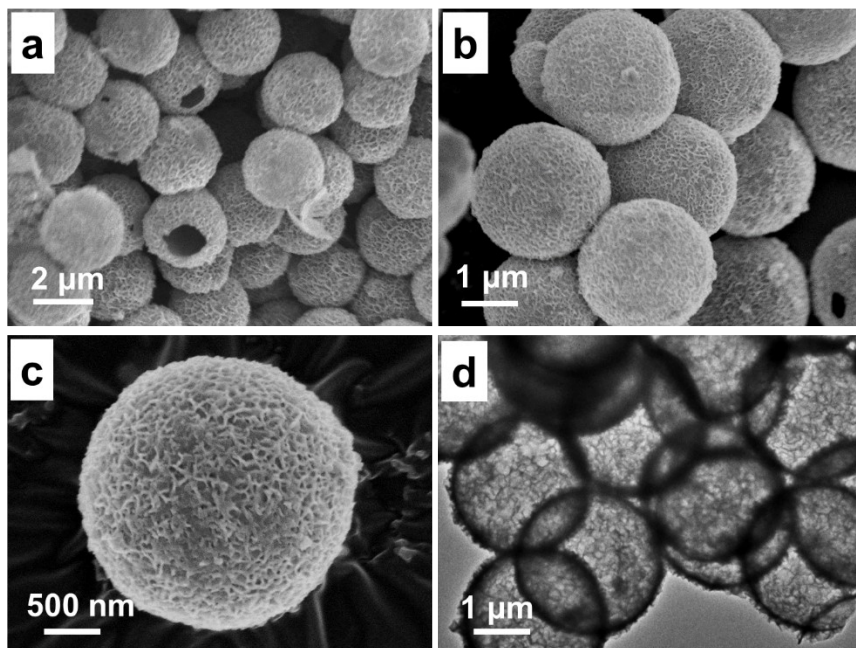

**Fig. S4.** (a)-(c) SEM images of  $\text{Ti}_3\text{C}_2\text{T}_x@\text{S-NiCoP}$ . (d) TEM image of  $\text{Ti}_3\text{C}_2\text{T}_x@\text{S-NiCoP}$ .

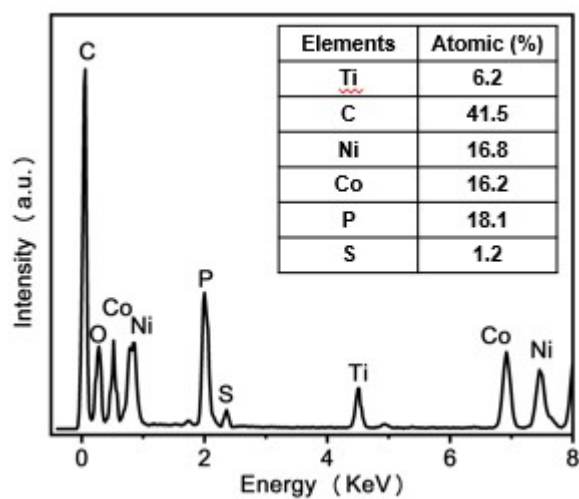

**Fig. S5.** EDS pattern of the  $\text{Ti}_3\text{C}_2\text{T}_x@\text{S-NiCoP}$  composite with elemental atomic ratio inserted.

**Table S1.** The elemental content (wt.%) of  $\text{Ti}_3\text{C}_2\text{T}_x@\text{S-NiCoP}$ ,  $\text{Ti}_3\text{C}_2\text{T}_x@\text{S-MnP/CoP}$  and  $\text{Ti}_3\text{C}_2\text{T}_x@\text{S-ZnP}_2/\text{CoP}$  obtained from ICP-OES results.

| Samples                                                     | Ti  | Co   | M        | P    | S   |
|-------------------------------------------------------------|-----|------|----------|------|-----|
| $\text{Ti}_3\text{C}_2\text{T}_x@\text{S-NiCoP}$            | 8.7 | 30.3 | Ni: 29.1 | 17.2 | 1.6 |
| $\text{Ti}_3\text{C}_2\text{T}_x@\text{S-MnP/CoP}$          | 6.2 | 32.7 | Mn:30.9  | 18.4 | 1.7 |
| $\text{Ti}_3\text{C}_2\text{T}_x@\text{S-ZnP}_2/\text{CoP}$ | 7.7 | 24.8 | Zn:32.2  | 27.5 | 2.1 |

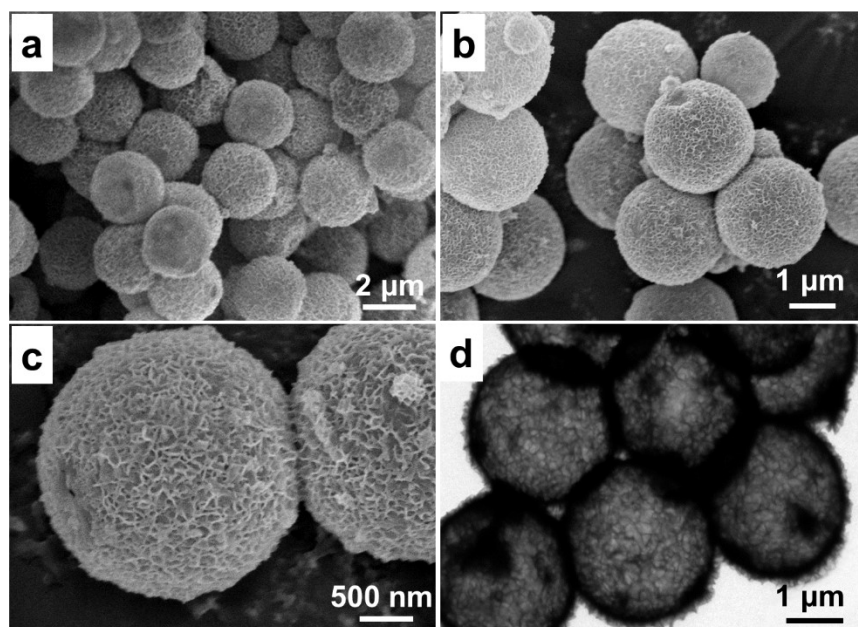

**Fig. S6.** (a)-(c) SEM images of  $\text{Ti}_3\text{C}_2\text{T}_x@\text{NiCoP}$ . (d) TEM image of  $\text{Ti}_3\text{C}_2\text{T}_x@\text{NiCoP}$ .

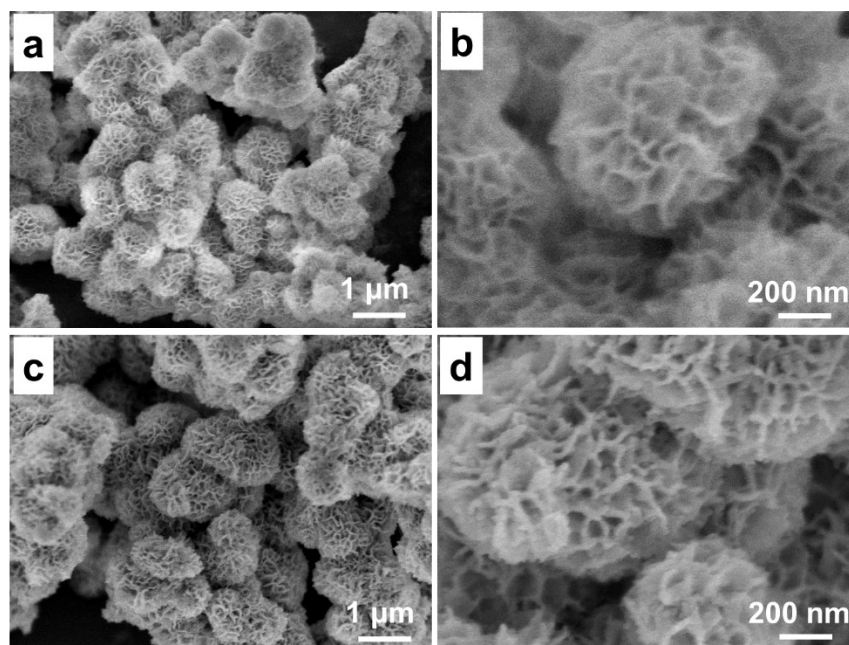

**Fig. S7.** (a)-(b) SEM images of NiCo-LDHs. (c)-(d) SEM images of S-NiCoP.

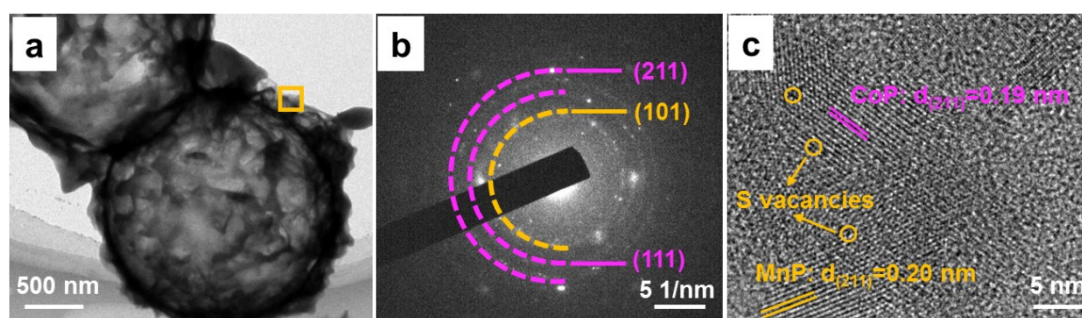

**Fig. S8.** (a)-(c) TEM, SAED and HRTEM images of  $\text{Ti}_3\text{C}_2\text{T}_x@\text{S-MnP/CoP}$ .

As shown in Fig. S8b, the SAED pattern shows several bright rings, which can be ascribed to the characteristic (101) plane of MnP and the (111) and (211) crystal planes of CoP. Fig. S8c displays the characteristic spacings of 0.19 and 0.20 nm, which can be attributed to the (211) plane of CoP and the (211) plane of MnP, respectively, illustrating the formation of MnP/CoP heterostructure.

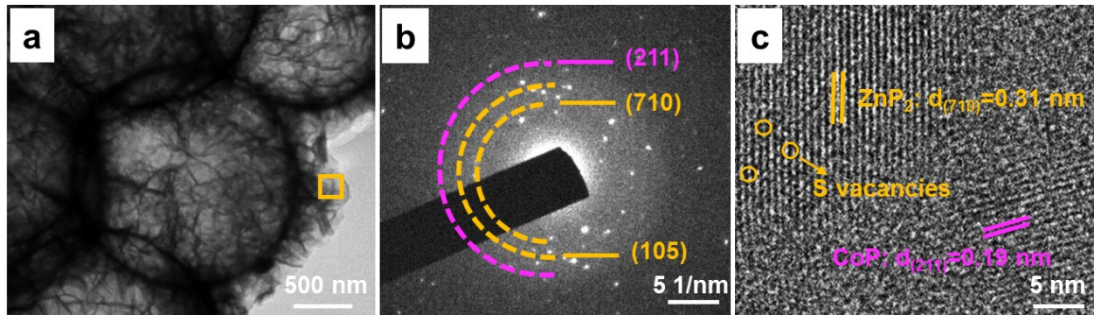

**Fig. S9.** (a)-(c) TEM, SAED and HRTEM images of  $\text{Ti}_3\text{C}_2\text{T}_x@\text{S-ZnP}_2/\text{CoP}$ .

As shown in Fig. S9b, the SAED pattern shows several bright rings, which can be ascribed to the characteristic (710) and (105) planes of  $\text{ZnP}_2$  and the (211) crystal plane of CoP. Fig. S9c displays the characteristic spacings of 0.19 and 0.31 nm, which can be attributed to the (211) plane of CoP and the (710) plane of  $\text{ZnP}_2$ , respectively, also illustrating the formation of  $\text{ZnP}_2/\text{CoP}$  heterostructure.



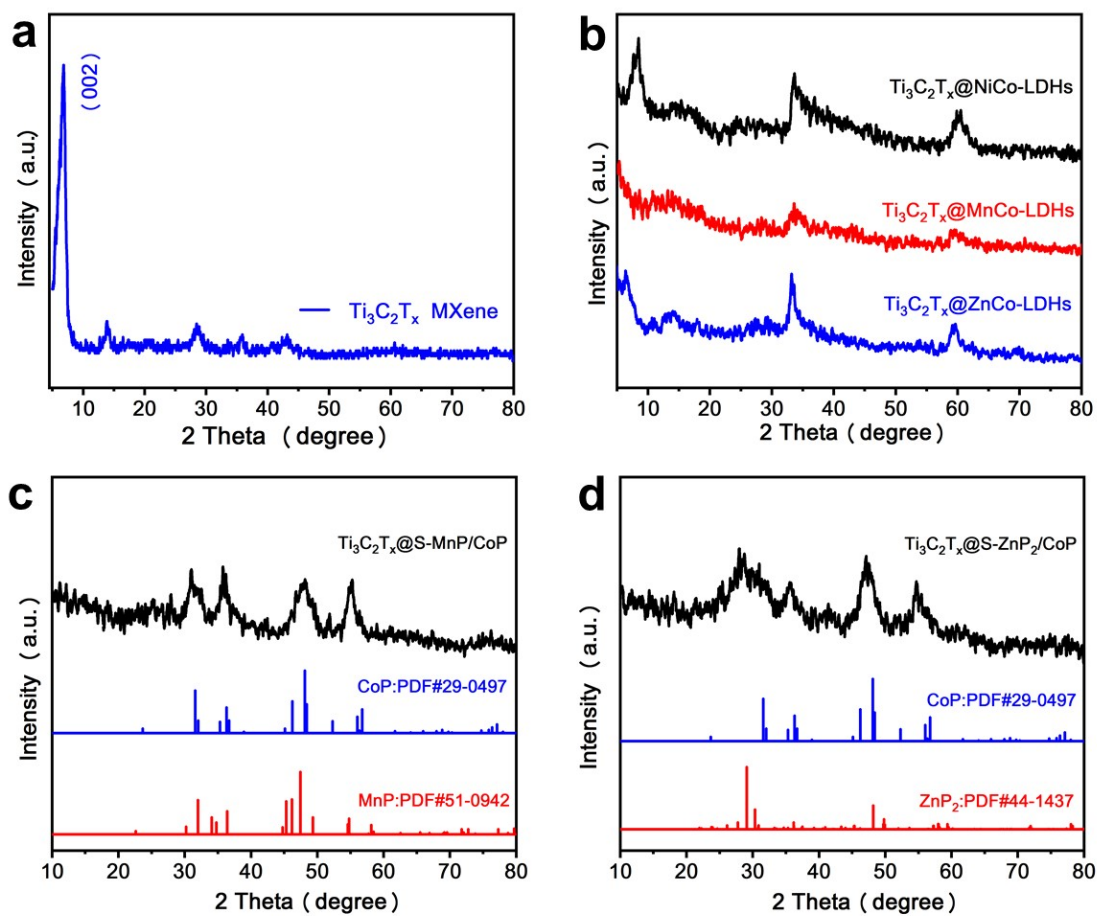

**Fig. S10.** (a) XRD pattern of  $Ti_3C_2T_x$  MXene. (b) XRD patterns of  $Ti_3C_2T_x@NiCo-LDHs$ ,  $Ti_3C_2T_x@MnCo-LDHs$  and  $Ti_3C_2T_x@ZnCo-LDHs$ . (c) XRD patterns of  $Ti_3C_2T_x@S-MnP/CoP$ . (d) XRD patterns of  $Ti_3C_2T_x@S-ZnP_2/CoP$ .

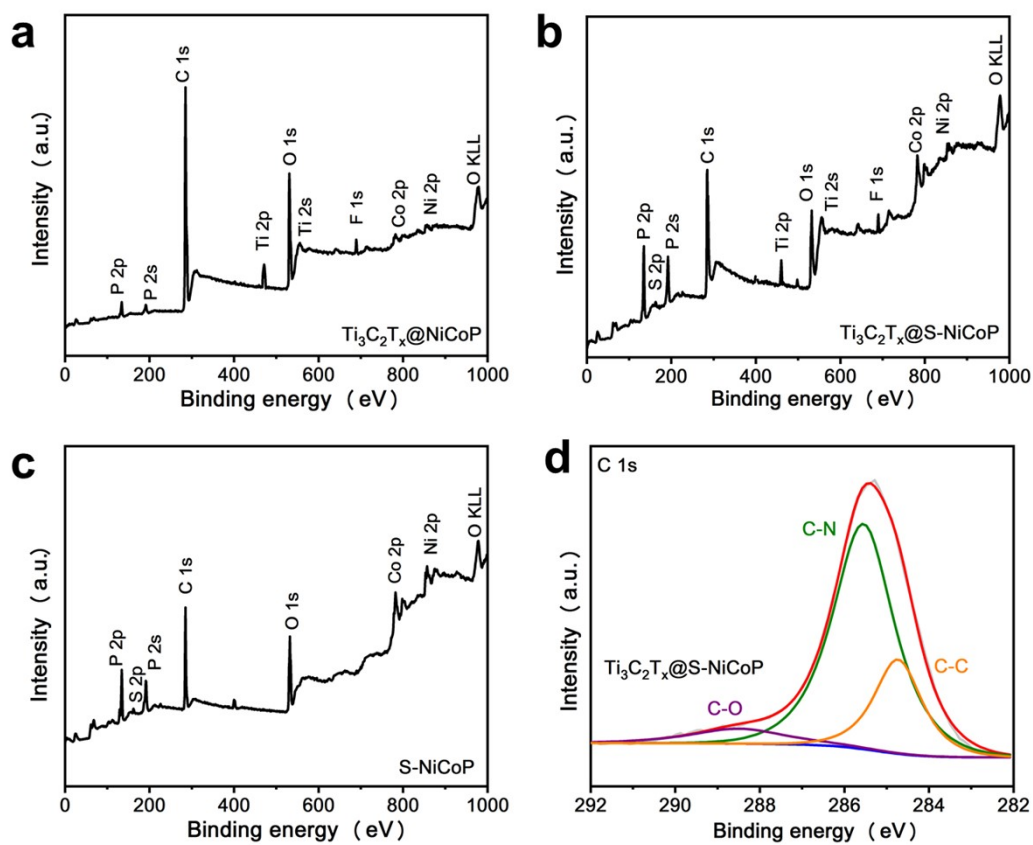

**Fig. S11.** XPS survey spectra of the as-prepared (a)  $\text{Ti}_3\text{C}_2\text{T}_x@\text{NiCoP}$ , (b)  $\text{Ti}_3\text{C}_2\text{T}_x@\text{S-NiCoP}$ , and (c)  $\text{S-NiCoP}$ . (d) High-resolution XPS spectra of C 1s for  $\text{Ti}_3\text{C}_2\text{T}_x@\text{S-NiCoP}$ .

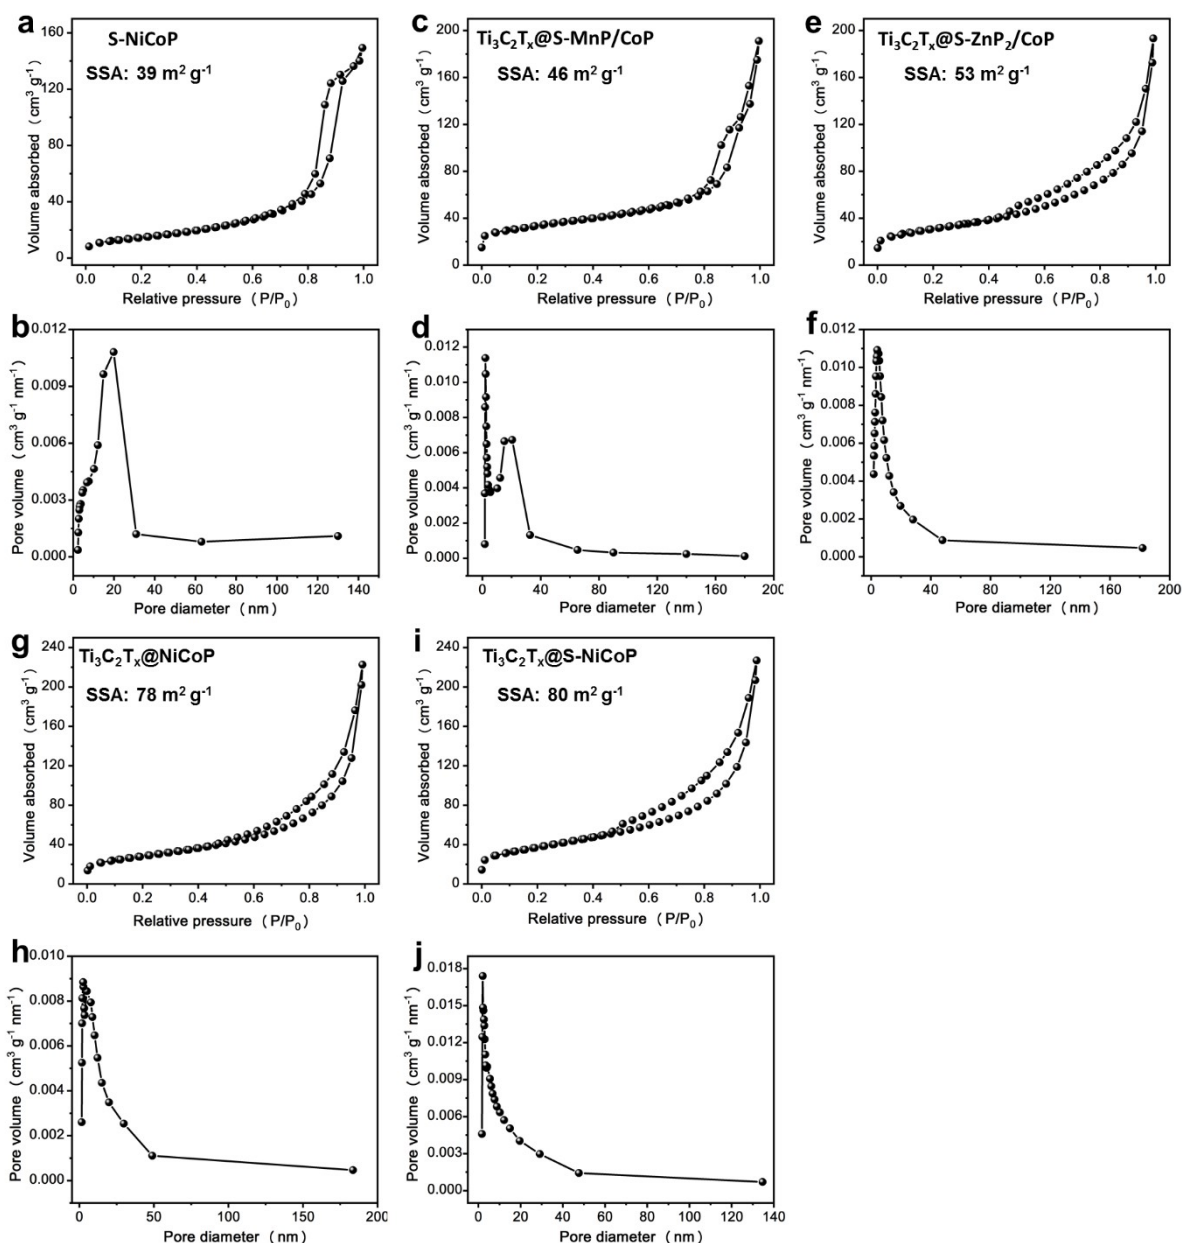

**Fig. S12.**  $N_2$  adsorption-desorption isotherms and pore size distribution of S-NiCoP (a)-(b),  $Ti_3C_2T_x@S-MnP/CoP$  (c)-(d),  $Ti_3C_2T_x@S-ZnP_2/CoP$  (e)-(f),  $Ti_3C_2T_x@NiCoP$  (g)-(h) and  $Ti_3C_2T_x@S-NiCoP$  (i)-(j).

As well known, the specific surface areas (SSAs) of active materials are important for their electrochemical performance. As shown in **Fig. S12**, we also used Brunauer-Emmett-Teller test to check SSAs and the pore size distribution of the samples. The calculated SSAs of S-NiCoP,  $Ti_3C_2T_x@S-MnP/CoP$ ,  $Ti_3C_2T_x@S-ZnP_2/CoP$ ,

$\text{Ti}_3\text{C}_2\text{T}_x@\text{NiCoP}$  and  $\text{Ti}_3\text{C}_2\text{T}_x@\text{S-NiCoP}$  are 39, 46, 53, 78 and 80  $\text{m}^2/\text{g}$ , respectively.

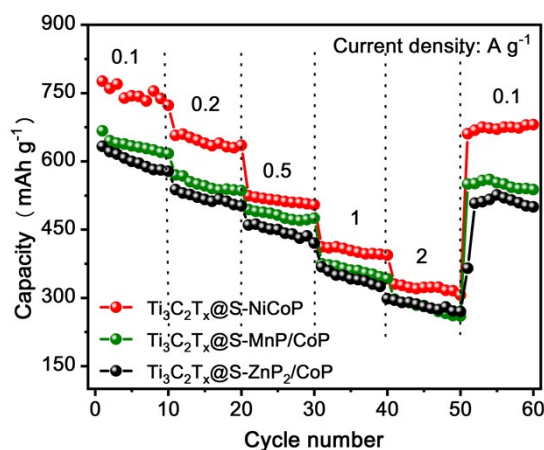

**Fig. S13.** The rate capability of  $\text{Ti}_3\text{C}_2\text{T}_x@\text{S-NiCoP}$ ,  $\text{Ti}_3\text{C}_2\text{T}_x@\text{S-MnP/CoP}$  and  $\text{Ti}_3\text{C}_2\text{T}_x@\text{S-ZnP}_2/\text{CoP}$  at different current densities.

As shown in **Fig. S13**, the rate capability of  $\text{Ti}_3\text{C}_2\text{T}_x@\text{S-NiCoP}$  is better than those of  $\text{Ti}_3\text{C}_2\text{T}_x@\text{S-MnP/CoP}$  and  $\text{Ti}_3\text{C}_2\text{T}_x@\text{S-ZnP}_2/\text{CoP}$  with specific capacities of 712, 630, 501, 407 and 298  $\text{mAh/g}$  at 0.1, 0.2, 0.5, 1 and 2  $\text{A/g}$ , respectively.

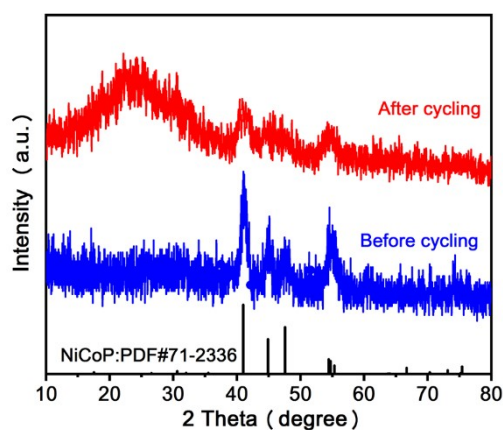

**Fig. S14.** The XRD patterns of  $\text{Ti}_3\text{C}_2\text{T}_x@\text{S-NiCoP}$  before cycling and after 100 cycles.

As shown in Fig. S14, the XRD patterns of  $\text{Ti}_3\text{C}_2\text{T}_x@\text{S-NiCoP}$  were provided before cycling and after 100 cycles. Compared to before cycling, the XRD signal of  $\text{Ti}_3\text{C}_2\text{T}_x@\text{S-NiCoP}$  becomes weaker after 100 cycles, but still matches the standard card of NiCoP (PDF#71-2336), indicating the excellent structural stability of  $\text{Ti}_3\text{C}_2\text{T}_x@\text{S-NiCoP}$ .

**Table S2. Performance comparison of  $\text{Ti}_3\text{C}_2\text{T}_x@\text{S-NiCoP}$  with reported TMPs-based anode materials for SIBs.**

| <b>Anode materials</b>                                             | <b>Specific Capacity<br/>(mAh g<sup>-1</sup>/A g<sup>-1</sup>)</b> | <b>Rate Capability<br/>(mAh g<sup>-1</sup>/A g<sup>-1</sup>)</b> | <b>Stability<br/>(mAh g<sup>-1</sup>/cycle number/A g<sup>-1</sup>)</b> | <b>Reference</b>            |
|--------------------------------------------------------------------|--------------------------------------------------------------------|------------------------------------------------------------------|-------------------------------------------------------------------------|-----------------------------|
| <b><math>\text{Ti}_3\text{C}_2\text{T}_x@\text{S-NiCoP}</math></b> | <b>563/0.2</b>                                                     | <b>407/1</b>                                                     | <b>348/3000/1</b>                                                       | <b>This work</b>            |
| GeP/CN <sup>[1]</sup>                                              | 762/0.1                                                            | 561/1                                                            | 553/350/0.5                                                             | Angew. Chem. Int. Ed., 2021 |
| MnP <sub>4</sub> /G20 <sup>[2]</sup>                               | 617/0.5                                                            | 478/1                                                            | 446/250/0.5                                                             | Adv. Energy Mater., 2021    |
| Sn <sub>4</sub> P <sub>3</sub> @CNF <sup>[3]</sup>                 | 712/0.1                                                            | 496/1                                                            | 336/500/1                                                               | J. Power Source 2020        |
| FeP@NPC <sup>[4]</sup>                                             | 557/0.1                                                            | 320/1                                                            | 253/300/1                                                               | Energy Storage Mater. 2020  |
| Ti <sub>3</sub> C <sub>2</sub> /NiCoP <sup>[5]</sup>               | 457.9/0.1                                                          | 278.1/1                                                          | 267.1/2000/1                                                            | Energy Environ. Sci., 2019  |
| Cu <sub>3</sub> P@C <sup>[6]</sup>                                 | 286/0.1                                                            | 215.8/1                                                          | 156/1000/1                                                              | J. Mater. Chem. A, 2019     |
| Ni <sub>1.5</sub> Co <sub>0.5</sub> P <sub>x</sub> <sup>[7]</sup>  | 826/0.2                                                            | 147.9/1                                                          | 188.9/100/1                                                             | Adv. Funct. Mater. 2018     |

| Anode materials                                       | Specific Capacity<br>(mAh g <sup>-1</sup> /A g <sup>-1</sup> ) | Rate Capability<br>(mAh g <sup>-1</sup> /A g <sup>-1</sup> ) | Stability<br>(mAh g <sup>-1</sup> /cycle number/A g <sup>-1</sup> ) | Reference                   |
|-------------------------------------------------------|----------------------------------------------------------------|--------------------------------------------------------------|---------------------------------------------------------------------|-----------------------------|
| Ni <sub>2</sub> P/NG/Ni <sub>2</sub> P <sup>[8]</sup> | 331.2/0.5                                                      | 188.1/1                                                      | 107.8/400/1                                                         | Energy Storage Mater., 2018 |
| FeP@Carbon <sup>[9]</sup>                             | 400/0.1                                                        | 237/1.6                                                      | /                                                                   | ACS Nano, 2017,             |
| Ni <sub>2</sub> P@C/GA <sup>[10]</sup>                | 253.6/0.1                                                      | 172.1/1                                                      | 124.5/2000/1                                                        | Small, 2017                 |
| CoP@C-RGO-NF <sup>[11]</sup>                          | 473.1/0.1                                                      | 253.6/0.8                                                    | /                                                                   | Nano Energy, 2017           |

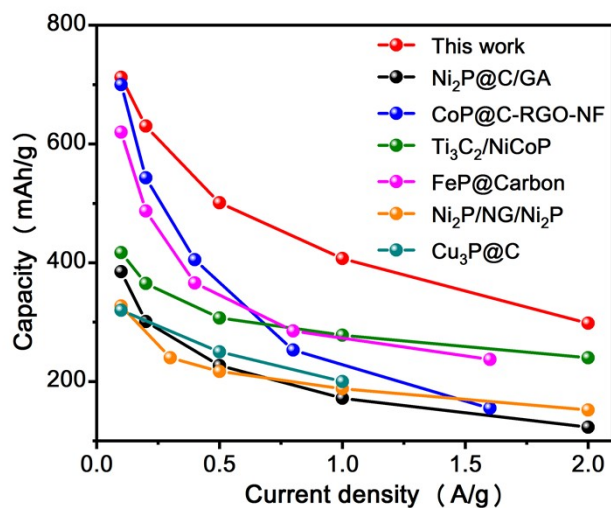

**Fig. S15.** The rate performance of Ti<sub>3</sub>C<sub>2</sub>T<sub>x</sub>@S-NiCoP electrode in comparison with previous reported TMPs.<sup>[5-6, 8-11]</sup>

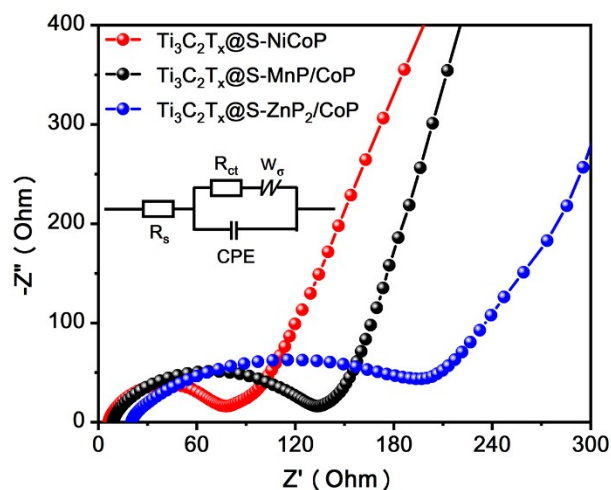

**Fig. S16.** Nyquist plots of  $\text{Ti}_3\text{C}_2\text{T}_x@\text{S-NiCoP}$ ,  $\text{Ti}_3\text{C}_2\text{T}_x@\text{S-MnP/CoP}$  and  $\text{Ti}_3\text{C}_2\text{T}_x@\text{S-ZnP}_2/\text{CoP}$ , the inset is the equivalent circuit model.

As shown in **Fig. S15**, the  $\text{Ti}_3\text{C}_2\text{T}_x@\text{S-NiCoP}$  shows smaller  $R_{ct}$  value ( $71 \Omega$ ) than those of  $\text{Ti}_3\text{C}_2\text{T}_x@\text{S-MnP/CoP}$  ( $133 \Omega$ ) and  $\text{Ti}_3\text{C}_2\text{T}_x@\text{S-ZnP}_2/\text{CoP}$  ( $208 \Omega$ ), verifying the faster charge transfer of  $\text{Ti}_3\text{C}_2\text{T}_x@\text{S-NiCoP}$ , also indicating its better electrochemical performance.



## References:

- [1] T. Zeng, H. He, H. Guan, R. Yuan, X. Liu and C. Zhang, *Angew. Chem. Int. Ed.*, 2021, **60**, 12103-12108.
- [2] K. H. Kim and S. H. Hong, *Adv. Energy Mater.*, 2021, **11**, 2003609.
- [3] L. Ran, I. Gentle, T. Y. Lin, B. Luo, N. Mo, M. Rana, M. Li, L. Wang and R. Knibbe, *J. Power Sources*, 2020, **461**, 228116.
- [4] S. Shi, Z. Li, L. Shen, X. Yin, Y. Liu, G. Chang, J. Wang, S. Xu, J. Zhang and Y. Zhao, *Energy Storage Mater.*, 2020, **29**, 78-83.
- [5] D. Zhao, R. Zhao, S. Dong, X. Miao, Z. Zhang, C. Wang and L. Yin, *Energy Environ. Sci.*, 2019, **12**, 2422-2432.
- [6] J. Zhu, Q. He, Y. Liu, J. Key, S. Nie, M. Wu and P. K. Shen, *J. Mater. Chem. A*, 2019, **7**, 16999-17007.
- [7] X. Wang, H. Guo, L. Liang, J. Zhang, B. Zhang, J. Wang, W. Luo, H. Liu and S. Dou, *Adv. Funct. Mater.*, 2018, **28**, 1801016.
- [8] C. Dong, L. Guo, Y. He, C. Chen, Y. Qian, Y. Chen and L. Xu, *Energy Storage Mater.*, 2018, **15**, 234-241.
- [9] X. Wang, K. Chen, G. Wang, X. Liu and H. Wang, *ACS Nano*, 2017, **11**, 11602-11616.
- [10] X. Miao, R. Yin, X. Ge, Z. Li and L. Yin, *Small*, 2017, **13**, 1702138.
- [11] X. Ge, Z. Li and L. Yin, *Nano Energy*, 2017, **32**, 117-124.
